# Supplementary material for: Balancing adipocyte production and lipid metabolism to treat obesity-induced diabetes with a novel proteoglycan from Ganoderma lucidum
Source: PubMed Central journal article supplement (PMC10408226; doi:10.1186/s12944-023-01880-6), 2023-08-08
Supplement: 12944_2023_1880_MOESM3_ESM.pdf [file 12944_2023_1880_MOESM3_ESM.pdf]

SPRINGER NATURE

# Author Services

## Springer Nature Author Services

Research Square AJE, LLC  
601 W Main St, Ste 102  
Durham, North Carolina, 27701, USA  
Tax ID: 412141424

### PAYMENT RECEIPT

Payment Date 04 Apr 2023

Reference Number 2023040422001459441434093787

Payment Mode Alipay

Amount Received  
CNY2,956.34

#### Received From

##### Ping Zhou

Fudan University, Jiangwan Campus, 2005 Songhu Road, Shanghai, China, 200438  
Shanghai  
200433  
China  
Ping Zhou  
13817800753

#### Payment for

| Invoice Number | Invoice Date | Invoice Amount | Payment Amount |
|----------------|--------------|----------------|----------------|
| SZH3B3RWG      | 04 Apr 2023  | CNY2,956.34    | CNY2,956.34    |
